# Supplementary material
Source: publisher site journal article supplement (https://www.spandidos-publications.com/4244/downloadSupplementary)
Supplement: Supplementary file 1 [file downloadSupplementary]

## Sheet: Sheet1
Table SI. Differentially expressed lncRNAs resulting from the patient sample vs. control comparison in the articles which met inclusion criteria.
lncRNA	Ensemble codea	Expression (Patient sample vs. Control)	Reference
TPTEP1	ENSG00000100181	up	Afinitto et al. 2020 (27)
SNX29P2/AC025279.1	ENSG00000198106	down	Afinitto et al. 2020
RP11–693J15.5/LINC02397	ENSG00000205056	down	Afinitto et al. 2020
PTCHD3P1/SVIL–AS1	ENSG00000224597	up	Afinitto et al. 2020
RP11–265P11.1/AC108879.1	ENSG00000224610	down	Afinitto et al. 2020
AC083949.1/EML4–AS1	ENSG00000224875	down	Afinitto et al. 2020
AP001055.6/LINC01678	ENSG00000225331	down	Afinitto et al. 2020
TEX41	ENSG00000226674	up	Afinitto et al. 2020
RP11–563N6.6/AC035139.1	ENSG00000228403	down	Afinitto et al. 2020
RP11–348F1.3/AC233976.1	ENSG00000229151	down	Afinitto et al. 2020
RP5–1071N3.1/ECE1–AS1	ENSG00000231105	down	Afinitto et al. 2020
AC009495.2/AC009495.3	ENSG00000235192	down	Afinitto et al. 2020
RP11–534L6.2/AC068898.1	ENSG00000236800	down	Afinitto et al. 2020
CECR7	ENSG00000237438	down	Afinitto et al. 2020
RP11–158I9.5/AP004609.3	ENSG00000245869	down	Afinitto et al. 2020
RP11–159H10.3/AC079089.1	ENSG00000246528	down	Afinitto et al. 2020
LINC00926	ENSG00000247982	down	Afinitto et al. 2020
CTD–2516F10.2/AC107884.1	ENSG00000251364	down	Afinitto et al. 2020
RP11–166A12.1/LINC02201	ENSG00000251538	down	Afinitto et al. 2020
RP11–624C23.1/AC120193.1	ENSG00000253535	down	Afinitto et al. 2020
RP11–326C3.2/AC136475.3	ENSG00000255026	up	Afinitto et al. 2020
AF131215.2/AF131215.5	ENSG00000255310	down	Afinitto et al. 2020
RP11–444D3.1	ENSG00000255864	down	Afinitto et al. 2020
RP11–219E7.1/AL133371.2	ENSG00000258810	down	Afinitto et al. 2020
LINC00984/INAFM2	ENSG00000259330	up	Afinitto et al. 2020
RP11–325K4.2/AC012181.1	ENSG00000261114	down	Afinitto et al. 2020
RP11–79H23.3/LINC02605	ENSG00000261618	down	Afinitto et al. 2020
RP11–35G9.5/AC027097.2	ENSG00000267787	down	Afinitto et al. 2020
AF131215.9/AF131215.6	ENSG00000269918	down	Afinitto et al. 2020
RP5–940J5.9/AC006064.4	ENSG00000269968	up	Afinitto et al. 2020
CDKN2B-AS1	ENSG00000240498	up	Chen et al. 2020 (29)
BALR-6	ENSG00000226238	up	Fernando et al 2015 (33)
BALR-2	ENSG00000237819	up	Fernando et al 2015
LINC00958	ENSG00000251381	up	Fernando et al 2015
BALR-1		up	Fernando et al 2015
SNHG5	ENSG00000203875	up	Garitano-Trojaola et al. 2018 (18)
MEG3	ENSG00000214548	down	Garitano-Trojaola et al. 2018
AC074289.1	ENSG00000225889	down	Garitano-Trojaola et al. 2018
LINC01132	ENSG00000227630	up	Garitano-Trojaola et al. 2018
EPHA1-AS1	ENSG00000229153	down	Garitano-Trojaola et al. 2018
Linc-PINT	ENSG00000231721	down	Garitano-Trojaola et al. 2018
STXBP5-AS1	ENSG00000233452	down	Garitano-Trojaola et al. 2018
LINC01503	ENSG00000233901	down	Garitano-Trojaola et al 2018
MAGI2-AS3	ENSG00000234456	down	Garitano-Trojaola et al. 2018
MAGI2-AS3	ENSG00000234456	down	Garitano-Trojaola et al. 2018
ITGA9-AS1	ENSG00000235257	up	Garitano-Trojaola et al. 2018
LINC00861	ENSG00000245164	down	Garitano-Trojaola et al. 2018
CRNDE	ENSG00000245694	up	Garitano-Trojaola et al. 2018
LINC00989	ENSG00000250334	down	Garitano-Trojaola et al. 2018
RP4-798P15.3	ENSG00000254154	down	Garitano-Trojaola et al. 2018
RP11-747H7.3	ENSG00000260711	down	Garitano-Trojaola et al. 2018
RP11-747H7.3	ENSG00000260711	down	Garitano-Trojaola et al. 2018
RP11-879F14.3	ENSG00000267316	down	Garitano-Trojaola et al. 2018
RP11-879F14.2	ENSG00000267316	down	Garitano-Trojaola et al. 2018
RP11-130L8.2	ENSG00000269976	down	Garitano-Trojaola et al. 2018
LINC01127	ENSG00000281162	down	Garitano-Trojaola et al. 2018
LINC01127	ENSG00000281162	down	Garitano-Trojaola et al. 2018
AC093627.8	ENSG00000281349	down	Garitano-Trojaola et al. 2018
AL132709.8	ENSG00000288302	down	Garitano-Trojaola et al. 2018
G016922		down	Garitano-Trojaola et al. 2018
G046706		down	Garitano-Trojaola et al. 2018
G082883		down	Garitano-Trojaola et al. 2018
G071770		down	Garitano-Trojaola et al. 2018
G074897		down	Garitano-Trojaola et al. 2018
G056969		up	Garitano-Trojaola et al. 2018
BMThy_chr1_0414		down	Lajoie et al. 2017 (37)
BMThy_chr1_0514		down	Lajoie et al. 2017
lnc-NAV1-1		up	Lajoie et al. 2017
BMThy_chr1_0645		up	Lajoie et al. 2017
BMThy_chr1_0655		down	Lajoie et al. 2017
lnc-CD46-1		up	Lajoie et al. 2017
BMThy_chr1_0668		up	Lajoie et al. 2017
BMThy_chr1_0703		up	Lajoie et al. 2017
/lnc-NLRP3-1/lnc-NLRP3-2		up	Lajoie et al. 2017
BMThy_chr1_0884		up	Lajoie et al. 2017
BMThy_chr1_0925		down	Lajoie et al. 2017
BMThy_chr1_1015		up	Lajoie et al. 2017
BMThy_chr1_1045		up	Lajoie et al. 2017
BMThy_chr1_1120		down	Lajoie et al. 2017
lnc-NOTCH2-2		down	Lajoie et al. 2017
BMThy_chr1_1339		up	Lajoie et al. 2017
lnc-AKT3-2		down	Lajoie et al. 2017
BMThy_chr10_0280		up	Lajoie et al. 2017
BMThy_chr10_0281		up	Lajoie et al. 2017
BMThy_chr10_0285		up	Lajoie et al. 2017
BMThy_chr10_0358		up	Lajoie et al. 2017
BMThy_chr10_0460		up	Lajoie et al. 2017
BMThy_chr10_0600		up	Lajoie et al. 2017
BMThy_chr11_0007		down	Lajoie et al. 2017
BMThy_chr11_0130		down	Lajoie et al. 2017
lnc-SPCS2-1		down	Lajoie et al. 2017
BMThy_chr11_0305		down	Lajoie et al. 2017
BMThy_chr11_0469		up	Lajoie et al. 2017
BMThy_chr11_0624		up	Lajoie et al. 2017
lnc-RP11-712L6.5.1-2		up	Lajoie et al. 2017
BMThy_chr12_0010		up	Lajoie et al. 2017
BMThy_chr12_0017		up	Lajoie et al. 2017
BMThy_chr12_0031		up	Lajoie et al. 2017
BMThy_chr12_0070		down	Lajoie et al. 2017
BMThy_chr12_0473		down	Lajoie et al. 2017
lnc-H3F3C-1		down	Lajoie et al. 2017
BMThy_chr12_0763		up	Lajoie et al. 2017
BMThy_chr12_0845		down	Lajoie et al. 2017
ENSG00000276476		down	Lajoie et al. 2017
BMThy_chr13_0068		up	Lajoie et al. 2017
BMThy_chr13_0137		down	Lajoie et al. 2017
BMThy_chr13_0208		down	Lajoie et al. 2017
lnc-TPT1-1		down	Lajoie et al. 2017
BMThy_chr13_0482		up	Lajoie et al. 2017
lnc-GPR183-2		up	Lajoie et al. 2017
BMThy_chr13_0531		up	Lajoie et al. 2017
BMThy_chr14_0083		up	Lajoie et al. 2017
lnc-FUT8-1		down	Lajoie et al. 2017
BMThy_chr14_0314		up	Lajoie et al. 2017
BMThy_chr14_0421		down	Lajoie et al. 2017
BMThy_chr14_0432		up	Lajoie et al. 2017
BMThy_chr14_0647		down	Lajoie et al. 2017
lnc-CHD2-2		up	Lajoie et al. 2017
BMThy_chr15_0274		up	Lajoie et al. 2017
lnc-LRRC28-1		down	Lajoie et al. 2017
BMThy_chr15_0300		up	Lajoie et al. 2017
lnc-OIP5-1		up	Lajoie et al. 2017
BMThy_chr15_0490		up	Lajoie et al. 2017
BMThy_chr15_0500		down	Lajoie et al. 2017
BMThy_chr16_0186		up	Lajoie et al. 2017
BMThy_chr16_0288		up	Lajoie et al. 2017
BMThy_chr16_0422		up	Lajoie et al. 2017
lnc-SIAH1-1		down	Lajoie et al. 2017
BMThy_chr16_0541		up	Lajoie et al. 2017
lnc-PMFBP1-3		down	Lajoie et al. 2017
BMThy_chr16_0608		up	Lajoie et al. 2017
BMThy_chr16_0673		up	Lajoie et al. 2017
BMThy_chr17_0053		up	Lajoie et al. 2017
lnc-CCR7-1		down	Lajoie et al. 2017
lnc-DNAJC7-1		down	Lajoie et al. 2017
ENSG00000267080		down	Lajoie et al. 2017
BMThy_chr17_0631		up	Lajoie et al. 2017
BMThy_chr17_0670		down	Lajoie et al. 2017
lnc-NEDD4L-2		down	Lajoie et al. 2017
BMThy_chr18_0176		up	Lajoie et al. 2017
lnc-KCNG2-1		up	Lajoie et al. 2017
lnc-ENOSF1-1		up	Lajoie et al. 2017
lnc-FBXO15-5		up	Lajoie et al. 2017
lnc-FBXO15-3		up	Lajoie et al. 2017
BMThy_chr19_0015		up	Lajoie et al. 2017
BMThy_chr19_0023		down	Lajoie et al. 2017
lnc-ZNF85-2		up	Lajoie et al. 2017
BMThy_chr19_0098		up	Lajoie et al. 2017
BMThy_chr19_0175		down	Lajoie et al. 2017
BMThy_chr19_0297		down	Lajoie et al. 2017
lnc-NFKBID-1		down	Lajoie et al. 2017
BMThy_chr2_0156		down	Lajoie et al. 2017
BMThy_chr2_0159		up	Lajoie et al. 2017
lnc-VRK2-2		up	Lajoie et al. 2017
BMThy_chr2_0208		up	Lajoie et al. 2017
BMThy_chr2_0299		up	Lajoie et al. 2017
lnc-UNC50-1		up	Lajoie et al. 2017
/lnc-GLI2-3/lnc-GLI2-4		up	Lajoie et al. 2017
BMThy_chr2_0441		up	Lajoie et al. 2017
BMThy_chr2_0448		up	Lajoie et al. 2017
BMThy_chr2_0465		down	Lajoie et al. 2017
lnc-TSSC1-3		up	Lajoie et al. 2017
BMThy_chr2_0842		down	Lajoie et al. 2017
BMThy_chr2_0933		down	Lajoie et al. 2017
BMThy_chr2_0935		down	Lajoie et al. 2017
lnc-FAM161A-1		down	Lajoie et al. 2017
BMThy_chr2_0965		down	Lajoie et al. 2017
lnc-RAB1A-3		down	Lajoie et al. 2017
BMThy_chr2_1068		down	Lajoie et al. 2017
BMThy_chr2_1167		up	Lajoie et al. 2017
BMThy_chr2_1168		up	Lajoie et al. 2017
BMThy_chr2_1169		up	Lajoie et al. 2017
BMThy_chr2_1171		up	Lajoie et al. 2017
BMThy_chr2_1244		down	Lajoie et al. 2017
BMThy_chr2_1375		down	Lajoie et al. 2017
lnc-RP11-410N8.4.1-3		up	Lajoie et al. 2017
lnc-SLC17A9-2		up	Lajoie et al. 2017
lnc-IDH3B-1		up	Lajoie et al. 2017
BMThy_chr20_0371		up	Lajoie et al. 2017
BMThy_chr21_0041		up	Lajoie et al. 2017
BMThy_chr21_0096		up	Lajoie et al. 2017
lnc-SETD4-4		down	Lajoie et al. 2017
BMThy_chr21_0256		up	Lajoie et al. 2017
lnc-C21orf58-1		up	Lajoie et al. 2017
BMThy_chr22_0006		up	Lajoie et al. 2017
BMThy_chr22_0047		up	Lajoie et al. 2017
lnc-TBC1D22A-1		down	Lajoie et al. 2017
BMThy_chr22_0222		up	Lajoie et al. 2017
BMThy_chr22_0324		up	Lajoie et al. 2017
BMThy_chr3_0021		down	Lajoie et al. 2017
lnc-UBE2E2-1		down	Lajoie et al. 2017
BMThy_chr3_0051		up	Lajoie et al. 2017
BMThy_chr3_0052		up	Lajoie et al. 2017
BMThy_chr3_0053		up	Lajoie et al. 2017
BMThy_chr3_0076		down	Lajoie et al. 2017
BMThy_chr3_0078		up	Lajoie et al. 2017
BMThy_chr3_0083		down	Lajoie et al. 2017
BMThy_chr3_0182		up	Lajoie et al. 2017
BMThy_chr3_0390		up	Lajoie et al. 2017
BMThy_chr3_0391		up	Lajoie et al. 2017
BMThy_chr3_0393		up	Lajoie et al. 2017
BMThy_chr3_0394		up	Lajoie et al. 2017
BMThy_chr3_0798		up	Lajoie et al. 2017
lnc-IGSF10-1		up	Lajoie et al. 2017
BMThy_chr4_0046		down	Lajoie et al. 2017
BMThy_chr4_0065		up	Lajoie et al. 2017
BMThy_chr4_0296		up	Lajoie et al. 2017
BMThy_chr4_0297		up	Lajoie et al. 2017
lnc-UGT8-1		down	Lajoie et al. 2017
BMThy_chr4_0352		up	Lajoie et al. 2017
BMThy_chr4_0391		up	Lajoie et al. 2017
BMThy_chr4_0405		up	Lajoie et al. 2017
lnc-ARHGAP10-3		up	Lajoie et al. 2017
BMThy_chr4_0407		up	Lajoie et al. 2017
BMThy_chr4_0416		up	Lajoie et al. 2017
BMThy_chr4_0419		up	Lajoie et al. 2017
BMThy_chr4_0463		up	Lajoie et al. 2017
BMThy_chr4_0465		up	Lajoie et al. 2017
BMThy_chr4_0551		up	Lajoie et al. 2017
BMThy_chr4_0595		down	Lajoie et al. 2017
BMThy_chr4_0663		down	Lajoie et al. 2017
BMThy_chr4_0736		up	Lajoie et al. 2017
BMThy_chr4_0898		up	Lajoie et al. 2017
lnc-FRG2-5		up	Lajoie et al. 2017
lnc-FRG2-3		up	Lajoie et al. 2017
BMThy_chr5_0048		up	Lajoie et al. 2017
BMThy_chr5_0234		up	Lajoie et al. 2017
lnc-APC-2		down	Lajoie et al. 2017
BMThy_chr5_0385		down	Lajoie et al. 2017
BMThy_chr5_0439		up	Lajoie et al. 2017
lnc-ARSI-1		down	Lajoie et al. 2017
BMThy_chr5_1054		up	Lajoie et al. 2017
BMThy_chr5_1057		up	Lajoie et al. 2017
lnc-BMP6-5		down	Lajoie et al. 2017
lnc-CD83-5		down	Lajoie et al. 2017
BMThy_chr6_0132		up	Lajoie et al. 2017
lnc-QRSL1-2		up	Lajoie et al. 2017
BMThy_chr6_0347		up	Lajoie et al. 2017
lnc-ASF1A-3		up	Lajoie et al. 2017
BMThy_chr6_0390		up	Lajoie et al. 2017
lnc-ASF1A-4		down	Lajoie et al. 2017
BMThy_chr6_0430		up	Lajoie et al. 2017
BMThy_chr6_0431		up	Lajoie et al. 2017
BMThy_chr6_0442		up	Lajoie et al. 2017
lnc-ARID1B-2		up	Lajoie et al. 2017
lnc-EXOC2-3		down	Lajoie et al. 2017
BMThy_chr6_0569		down	Lajoie et al. 2017
lnc-ELOVL5-2		down	Lajoie et al. 2017
lnc-HACE1-3		up	Lajoie et al. 2017
BMThy_chr6_0878		up	Lajoie et al. 2017
lnc-MOXD1-1		up	Lajoie et al. 2017
lnc-TXLNB-1		up	Lajoie et al. 2017
BMThy_chr7_0123		up	Lajoie et al. 2017
lnc-STARD3NL-1		up	Lajoie et al. 2017
lnc-STK17A-1		down	Lajoie et al. 2017
BMThy_chr7_0250		up	Lajoie et al. 2017
BMThy_chr7_0363		down	Lajoie et al. 2017
lnc-ARHGEF5-2		up	Lajoie et al. 2017
BMThy_chr7_0423		up	Lajoie et al. 2017
BMThy_chr7_0424		up	Lajoie et al. 2017
BMThy_chr7_0475		up	Lajoie et al. 2017
lnc-SKAP2-1		down	Lajoie et al. 2017
BMThy_chr7_0542		up	Lajoie et al. 2017
BMThy_chr7_0587		up	Lajoie et al. 2017
BMThy_chr7_0588		down	Lajoie et al. 2017
BMThy_chr7_0835		up	Lajoie et al. 2017
BMThy_chr7_0836		up	Lajoie et al. 2017
lnc-DLGAP2-4		up	Lajoie et al. 2017
lnc-DLGAP2-2		up	Lajoie et al. 2017
BMThy_chr8_0177		up	Lajoie et al. 2017
BMThy_chr8_0249		up	Lajoie et al. 2017
BMThy_chr8_0290		down	Lajoie et al. 2017
BMThy_chr8_0292		up	Lajoie et al. 2017
BMThy_chr8_0314		up	Lajoie et al. 2017
BMThy_chr8_0421		down	Lajoie et al. 2017
lnc-LONRF1-2		up	Lajoie et al. 2017
BMThy_chr8_0500		up	Lajoie et al. 2017
lnc-KIF13B-2		down	Lajoie et al. 2017
BMThy_chr8_0620		up	Lajoie et al. 2017
lnc-EXT1-4		up	Lajoie et al. 2017
BMThy_chr8_0830		up	Lajoie et al. 2017
BMThy_chr8_0833		up	Lajoie et al. 2017
BMThy_chr8_0834		up	Lajoie et al. 2017
lnc-KDM4C-3		down	Lajoie et al. 2017
BMThy_chr9_0160		up	Lajoie et al. 2017
lnc-GCNT1-1		down	Lajoie et al. 2017
lnc-EGFL7-1		up	Lajoie et al. 2017
BMThy_chr9_0568		up	Lajoie et al. 2017
BMThy_chr9_0569		down	Lajoie et al. 2017
BMThy_chr9_0624		up	Lajoie et al. 2017
lnc-SLC2A6-1		down	Lajoie et al. 2017
BMThy_chr9_0813		down	Lajoie et al. 2017
SPPL2B	ENSG00000005206	down	Lajoie et al. 2017
MAP3K14	ENSG00000006062	down	Lajoie et al. 2017
SEMA3B	ENSG00000012171	down	Lajoie et al. 2017
UHRF1	ENSG00000034063	up	Lajoie et al. 2017
PLK1S1	ENSG00000088970	down	Lajoie et al. 2017
XXbac-B461K10.4	ENSG00000093100	down	Lajoie et al. 2017
TPTEP1	ENSG00000100181	up	Lajoie et al. 2017
LINC00544	ENSG00000122043	up	Lajoie et al. 2017
ERVK3-1	ENSG00000142396	down	Lajoie et al. 2017
SPON1	ENSG00000152268	up	Lajoie et al. 2017
LINC00467	ENSG00000153363	down	Lajoie et al. 2017
SNHG16	ENSG00000163597	down	Lajoie et al. 2017
RP11-25K19.1	ENSG00000167912	up	Lajoie et al. 2017
LINC00208	ENSG00000170983	down	Lajoie et al. 2017
MIR4435-1HG	ENSG00000172965	up	Lajoie et al. 2017
RP11-23P13.6	ENSG00000174171	down	Lajoie et al. 2017
AC004840.9	ENSG00000175873	down	Lajoie et al. 2017
CTD-2369P2.2	ENSG00000175898	down	Lajoie et al. 2017
MRVI1-AS1	ENSG00000177112	down	Lajoie et al. 2017
CASC2	ENSG00000177640	up	Lajoie et al. 2017
CTD-2201E18.3	ENSG00000177738	down	Lajoie et al. 2017
LINC00324	ENSG00000178977	down	Lajoie et al. 2017
LINC00174	ENSG00000179406	down	Lajoie et al. 2017
ACTA2-AS1	ENSG00000180139	down	Lajoie et al. 2017
LINC00304	ENSG00000180422	down	Lajoie et al. 2017
CTD-3064H18.4	ENSG00000180458	up	Lajoie et al. 2017
RP11-290F5.2	ENSG00000180712	up	Lajoie et al. 2017
WDFY3-AS2	ENSG00000180769	up	Lajoie et al. 2017
HECW1-IT1	ENSG00000181211	up	Lajoie et al. 2017
RP11-69E11.4	ENSG00000182109	down	Lajoie et al. 2017
RP1-86D1.3	ENSG00000182404	up	Lajoie et al. 2017
WT1-AS	ENSG00000183242	up	Lajoie et al. 2017
AC005037.3	ENSG00000183308	down	Lajoie et al. 2017
AC084219.4	ENSG00000186019	up	Lajoie et al. 2017
MATN1-AS1	ENSG00000186056	down	Lajoie et al. 2017
KTN1-AS1	ENSG00000186615	up	Lajoie et al. 2017
LINC00265	ENSG00000188185	down	Lajoie et al. 2017
HNRNPU-AS1	ENSG00000188206	down	Lajoie et al. 2017
RP11-427H3.3	ENSG00000188971	up	Lajoie et al. 2017
CRYM-AS1	ENSG00000189149	down	Lajoie et al. 2017
LINC00176	ENSG00000196421	down	Lajoie et al. 2017
PDXDC2P	ENSG00000196696	down	Lajoie et al. 2017
RP11-425I13.3	ENSG00000196951	down	Lajoie et al. 2017
ZNF833P	ENSG00000197332	up	Lajoie et al. 2017
SSPO	ENSG00000197558	up	Lajoie et al. 2017
CTC-301O7.4	ENSG00000197813	down	Lajoie et al. 2017
SNX29P2	ENSG00000198106	down	Lajoie et al. 2017
AC009499.1	ENSG00000203386	up	Lajoie et al. 2017
C1orf132	ENSG00000203709	down	Lajoie et al. 2017
RP11-638F5.1	ENSG00000204603	down	Lajoie et al. 2017
CTD-3065J16.6	ENSG00000204791	up	Lajoie et al. 2017
TTC25	ENSG00000204815	down	Lajoie et al. 2017
ATP6V0E2-AS1	ENSG00000204934	up	Lajoie et al. 2017
RP11-693J15.5	ENSG00000205056	down	Lajoie et al. 2017
LINC00654	ENSG00000205181	up	Lajoie et al. 2017
ADARB2-AS1	ENSG00000205696	up	Lajoie et al. 2017
lnc-LOH12CR1-1	ENSG00000205791	down	Lajoie et al. 2017
LINC00487	ENSG00000205837	up	Lajoie et al. 2017
AP000525.9	ENSG00000206195	up	Lajoie et al. 2017
SETD5-AS1	ENSG00000206573	down	Lajoie et al. 2017
SNORD91B	ENSG00000212552	down	Lajoie et al. 2017
LINC00277	ENSG00000212766	up	Lajoie et al. 2017
LINC00671	ENSG00000213373	up	Lajoie et al. 2017
RP11-15H20.6	ENSG00000213971	up	Lajoie et al. 2017
LINC00887	ENSG00000214145	down	Lajoie et al. 2017
RP11-261C10.3	ENSG00000214837	down	Lajoie et al. 2017
CD27-AS1	ENSG00000215039	down	Lajoie et al. 2017
lnc-ZNF131-4	ENSG00000215068	up	Lajoie et al. 2017
AC025171.1	ENSG00000215068	down	Lajoie et al. 2017
lnc-C5orf39-2	ENSG00000215068	down	Lajoie et al. 2017
RP11-43F13.3	ENSG00000215246	up	Lajoie et al. 2017
DHRS4-AS1	ENSG00000215256	up	Lajoie et al. 2017
LINC00478	ENSG00000215386	up	Lajoie et al. 2017
AP001053.11	ENSG00000215458	up	Lajoie et al. 2017
LINC01139	ENSG00000215808	up	Lajoie et al. 2017
LY86-AS1	ENSG00000216863	down	Lajoie et al. 2017
RP4-800J21.3	ENSG00000218018	down	Lajoie et al. 2017
RP11-137L10.6	ENSG00000221817	down	Lajoie et al. 2017
AC112721.2	ENSG00000222032	up	Lajoie et al. 2017
LINC00152	ENSG00000222041	up	Lajoie et al. 2017
AC064834.2	ENSG00000223466	up	Lajoie et al. 2017
GS1-124K5.3	ENSG00000223473	down	Lajoie et al. 2017
NUTM2A-AS1	ENSG00000223482	down	Lajoie et al. 2017
RP1-90L6.2	ENSG00000223704	down	Lajoie et al. 2017
AC007879.5	ENSG00000223725	down	Lajoie et al. 2017
RP4-717I23.3	ENSG00000223745	down	Lajoie et al. 2017
RP11-403I13.4	ENSG00000223779	down	Lajoie et al. 2017
RP11-473E2.2	ENSG00000223795	up	Lajoie et al. 2017
LINC00114	ENSG00000223806	up	Lajoie et al. 2017
AC147651.3	ENSG00000223855	up	Lajoie et al. 2017
RP11-553K8.2	ENSG00000223881	down	Lajoie et al. 2017
RP11-439L8.4	ENSG00000223907	up	Lajoie et al. 2017
AC007381.2	ENSG00000223929	down	Lajoie et al. 2017
AC009948.5	ENSG00000223960	up	Lajoie et al. 2017
RP11-136K14.2	ENSG00000224029	down	Lajoie et al. 2017
EPB41L4A-AS1	ENSG00000224032	down	Lajoie et al. 2017
RP5-1033H22.2	ENSG00000224093	down	Lajoie et al. 2017
AC079767.4	ENSG00000224137	down	Lajoie et al. 2017
AC009506.1	ENSG00000224152	up	Lajoie et al. 2017
AC096559.1	ENSG00000224184	up	Lajoie et al. 2017
LINC01133	ENSG00000224259	down	Lajoie et al. 2017
AC017104.6	ENSG00000224376	down	Lajoie et al. 2017
LINC00422	ENSG00000224429	up	Lajoie et al. 2017
RP11-13P5.1	ENSG00000224478	down	Lajoie et al. 2017
SH3BP5-AS1	ENSG00000224660	down	Lajoie et al. 2017
RP11-94M14.2	ENSG00000224750	up	Lajoie et al. 2017
AC083949.1	ENSG00000224875	down	Lajoie et al. 2017
AC005534.8	ENSG00000224903	down	Lajoie et al. 2017
RP5-1086K13.1	ENSG00000224950	up	Lajoie et al. 2017
AC090044.1	ENSG00000224957	down	Lajoie et al. 2017
LINC00618	ENSG00000225163	down	Lajoie et al. 2017
AC093818.1	ENSG00000225205	up	Lajoie et al. 2017
AP001055.6	ENSG00000225331	down	Lajoie et al. 2017
lnc-POTEJ-1	ENSG00000225341	up	Lajoie et al. 2017
RP11-63P12.6	ENSG00000225434	down	Lajoie et al. 2017
RP3-508I15.14	ENSG00000225450	down	Lajoie et al. 2017
PLCB1-IT1	ENSG00000225479	up	Lajoie et al. 2017
RP11-773D16.1	ENSG00000225484	down	Lajoie et al. 2017
AC002480.5	ENSG00000225541	down	Lajoie et al. 2017
RP4-784A16.5	ENSG00000225675	up	Lajoie et al. 2017
UBXN7-AS1	ENSG00000225822	down	Lajoie et al. 2017
AC002398.5	ENSG00000225872	up	Lajoie et al. 2017
AC074289.1	ENSG00000225889	down	Lajoie et al. 2017
RP11-554I8.1	ENSG00000225948	up	Lajoie et al. 2017
UBXN10-AS1	ENSG00000225986	up	Lajoie et al. 2017
RP11-552E20.4	ENSG00000226070	up	Lajoie et al. 2017
BAIAP2-AS1	ENSG00000226137	up	Lajoie et al. 2017
RP11-50E11.3	ENSG00000226200	down	Lajoie et al. 2017
AC132807.1	ENSG00000226238	up	Lajoie et al. 2017
AC009961.3	ENSG00000226266	down	Lajoie et al. 2017
RP1-80N2.2	ENSG00000226281	up	Lajoie et al. 2017
AC018359.1	ENSG00000226320	down	Lajoie et al. 2017
CTA-217C2.1	ENSG00000226328	down	Lajoie et al. 2017
lnc-AC013480.1.1-4	ENSG00000226398	down	Lajoie et al. 2017
CTA-292E10.6	ENSG00000226471	up	Lajoie et al. 2017
RP11-776H12.1	ENSG00000226476	up	Lajoie et al. 2017
AC007463.2	ENSG00000226506	up	Lajoie et al. 2017
RP11-445F6.2	ENSG00000226571	down	Lajoie et al. 2017
RP1-1J6.2	ENSG00000226648	up	Lajoie et al. 2017
RP11-137H2.4	ENSG00000226659	up	Lajoie et al. 2017
LINC01108	ENSG00000226673	down	Lajoie et al. 2017
TEX41	ENSG00000226674	up	Lajoie et al. 2017
ENTPD1-AS1	ENSG00000226688	down	Lajoie et al. 2017
AF127936.5	ENSG00000226751	up	Lajoie et al. 2017
AC109826.1	ENSG00000226791	up	Lajoie et al. 2017
ATE1-AS1	ENSG00000226864	up	Lajoie et al. 2017
SLC8A1-AS1	ENSG00000227028	up	Lajoie et al. 2017
LINC00511	ENSG00000227036	down	Lajoie et al. 2017
ITGB2-AS1	ENSG00000227039	down	Lajoie et al. 2017
CTA-85E5.10	ENSG00000227117	up	Lajoie et al. 2017
AC092755.4	ENSG00000227161	down	Lajoie et al. 2017
WDR11-AS1	ENSG00000227165	down	Lajoie et al. 2017
RP11-121A14.3	ENSG00000227200	up	Lajoie et al. 2017
HCG15	ENSG00000227214	up	Lajoie et al. 2017
RP11-69I8.3	ENSG00000227220	up	Lajoie et al. 2017
AC003051.1	ENSG00000227517	up	Lajoie et al. 2017
SLC2A1-AS1	ENSG00000227533	down	Lajoie et al. 2017
RP11-165J3.6	ENSG00000227603	down	Lajoie et al. 2017
LINC01132	ENSG00000227630	up	Lajoie et al. 2017
RP11-301G19.1	ENSG00000227706	up	Lajoie et al. 2017
RP11-439E19.3	ENSG00000227953	up	Lajoie et al. 2017
MFI2-AS1	ENSG00000228109	up	Lajoie et al. 2017
RP3-467K16.4	ENSG00000228140	down	Lajoie et al. 2017
AC093495.4	ENSG00000228242	down	Lajoie et al. 2017
RP11-251M1.1	ENSG00000228401	up	Lajoie et al. 2017
lnc-SRBD1-1	ENSG00000228481	down	Lajoie et al. 2017
GRK5-IT1	ENSG00000228485	down	Lajoie et al. 2017
LINC01013	ENSG00000228495	up	Lajoie et al. 2017
AC106875.1	ENSG00000228496	up	Lajoie et al. 2017
RP11-98I9.4	ENSG00000228506	down	Lajoie et al. 2017
AC007381.3	ENSG00000228590	down	Lajoie et al. 2017
RP11-574F21.2	ENSG00000228606	down	Lajoie et al. 2017
AC144450.1	ENSG00000228613	up	Lajoie et al. 2017
RP3-399L15.3	ENSG00000228624	down	Lajoie et al. 2017
AC005682.5	ENSG00000228649	down	Lajoie et al. 2017
RP11-556E13.1	ENSG00000228651	up	Lajoie et al. 2017
RP11-439L8.3	ENSG00000228682	up	Lajoie et al. 2017
LINC00954	ENSG00000228784	down	Lajoie et al. 2017
BACH1-IT2	ENSG00000228817	down	Lajoie et al. 2017
NEGR1-IT1	ENSG00000228853	up	Lajoie et al. 2017
AC104653.1	ENSG00000228857	down	Lajoie et al. 2017
RP11-404F10.2	ENSG00000228863	down	Lajoie et al. 2017
RP11-473E2.4	ENSG00000228877	up	Lajoie et al. 2017
RP1-86D1.2	ENSG00000228972	up	Lajoie et al. 2017
LINC00226	ENSG00000229084	up	Lajoie et al. 2017
CCDC26	ENSG00000229140	up	Lajoie et al. 2017
RP11-168O16.1	ENSG00000229191	down	Lajoie et al. 2017
RP11-521J24.1	ENSG00000229246	down	Lajoie et al. 2017
RP11-442N24__B.1	ENSG00000229388	up	Lajoie et al. 2017
RP11-35J23.1	ENSG00000229418	up	Lajoie et al. 2017
RP5-981O7.2	ENSG00000229591	down	Lajoie et al. 2017
lnc-MANEA-3	ENSG00000229600	up	Lajoie et al. 2017
RP11-330A16.1	ENSG00000229646	down	Lajoie et al. 2017
AC018462.2	ENSG00000229839	up	Lajoie et al. 2017
MIR181A1HG	ENSG00000229989	up	Lajoie et al. 2017
CDC42-IT1	ENSG00000230068	down	Lajoie et al. 2017
TMEM254-AS1	ENSG00000230091	down	Lajoie et al. 2017
RP11-117D22.2	ENSG00000230138	down	Lajoie et al. 2017
RP3-508I15.19	ENSG00000230149	down	Lajoie et al. 2017
AP000688.14	ENSG00000230212	up	Lajoie et al. 2017
XXYLT1-AS2	ENSG00000230266	up	Lajoie et al. 2017
RP11-359G22.2	ENSG00000230400	up	Lajoie et al. 2017
RP11-420G6.4	ENSG00000230438	down	Lajoie et al. 2017
PSMG3-AS1	ENSG00000230487	down	Lajoie et al. 2017
VAV3-AS1	ENSG00000230489	down	Lajoie et al. 2017
LIMD1-AS1	ENSG00000230530	down	Lajoie et al. 2017
AC091133.1	ENSG00000230532	down	Lajoie et al. 2017
RP11-305L7.1	ENSG00000230537	up	Lajoie et al. 2017
CTB-89H12.4	ENSG00000230551	down	Lajoie et al. 2017
RP11-413E1.4	ENSG00000230735	up	Lajoie et al. 2017
AC021188.4	ENSG00000230747	up	Lajoie et al. 2017
RP5-1071N3.1	ENSG00000231105	down	Lajoie et al. 2017
RP11-346D6.6	ENSG00000231131	up	Lajoie et al. 2017
RP11-495P10.8	ENSG00000231196	up	Lajoie et al. 2017
RP11-436K8.1	ENSG00000231252	up	Lajoie et al. 2017
TRERNA1	ENSG00000231265	up	Lajoie et al. 2017
AC007246.3	ENSG00000231312	down	Lajoie et al. 2017
LINC00689	ENSG00000231419	up	Lajoie et al. 2017
AC096579.7	ENSG00000231486	down	Lajoie et al. 2017
RP1-232L24.3	ENSG00000231533	up	Lajoie et al. 2017
AP006216.11	ENSG00000231611	down	Lajoie et al. 2017
RP11-522M21.3	ENSG00000231612	up	Lajoie et al. 2017
RP11-432J24.2	ENSG00000231705	down	Lajoie et al. 2017
LINC-PINT	ENSG00000231721	down	Lajoie et al. 2017
ITCH-IT1	ENSG00000231795	down	Lajoie et al. 2017
AC073342.12	ENSG00000231840	up	Lajoie et al. 2017
lnc-DHRS12-1	ENSG00000231856	up	Lajoie et al. 2017
RP11-327P2.5	ENSG00000231856	down	Lajoie et al. 2017
SIK3-IT1	ENSG00000231865	down	Lajoie et al. 2017
RP11-177F15.1	ENSG00000231877	up	Lajoie et al. 2017
LINC00202-2	ENSG00000231976	down	Lajoie et al. 2017
AP000474.1	ENSG00000231986	up	Lajoie et al. 2017
AP001059.5	ENSG00000232010	up	Lajoie et al. 2017
LEF1-AS1	ENSG00000232021	up	Lajoie et al. 2017
lnc-CEP19-1	ENSG00000232065	down	Lajoie et al. 2017
RPS6KA2-IT1	ENSG00000232082	up	Lajoie et al. 2017
lnc-NDFIP2-9	ENSG00000232132	down	Lajoie et al. 2017
AC009495.3	ENSG00000232411	down	Lajoie et al. 2017
CTD-3184A7.4	ENSG00000232442	down	Lajoie et al. 2017
NCKAP5-IT1	ENSG00000232474	up	Lajoie et al. 2017
RP11-14N7.2	ENSG00000232527	up	Lajoie et al. 2017
RP5-1031D4.2	ENSG00000232591	up	Lajoie et al. 2017
AC078883.3	ENSG00000232788	down	Lajoie et al. 2017
RP11-96K19.2	ENSG00000232811	down	Lajoie et al. 2017
AF127936.3	ENSG00000232884	up	Lajoie et al. 2017
RP11-136K14.1	ENSG00000232891	down	Lajoie et al. 2017
AC034220.3	ENSG00000233006	down	Lajoie et al. 2017
RP11-398B16.2	ENSG00000233052	up	Lajoie et al. 2017
ERVH48-1	ENSG00000233056	up	Lajoie et al. 2017
RP3-380B8.4	ENSG00000233064	up	Lajoie et al. 2017
RP11-344E13.3	ENSG00000233098	down	Lajoie et al. 2017
RP11-375A5.1	ENSG00000233099	up	Lajoie et al. 2017
RP11-220I1.1	ENSG00000233137	down	Lajoie et al. 2017
RP4-655J12.4	ENSG00000233154	up	Lajoie et al. 2017
RP11-421L21.3	ENSG00000233184	down	Lajoie et al. 2017
LINC00642	ENSG00000233208	up	Lajoie et al. 2017
AC019181.2	ENSG00000233255	down	Lajoie et al. 2017
RP13-614K11.1	ENSG00000233304	down	Lajoie et al. 2017
CHRM3-AS2	ENSG00000233355	up	Lajoie et al. 2017
RP11-16L9.3	ENSG00000233410	up	Lajoie et al. 2017
HOTAIRM1	ENSG00000233429	down	Lajoie et al. 2017
RP11-57H14.2	ENSG00000233547	up	Lajoie et al. 2017
AC139887.4	ENSG00000233799	up	Lajoie et al. 2017
AC131097.3	ENSG00000233806	up	Lajoie et al. 2017
KCNQ5-IT1	ENSG00000233844	down	Lajoie et al. 2017
AC016907.3	ENSG00000233862	down	Lajoie et al. 2017
AC007131.2	ENSG00000233891	up	Lajoie et al. 2017
AC026202.3	ENSG00000233912	up	Lajoie et al. 2017
RP3-388E23.2	ENSG00000234084	up	Lajoie et al. 2017
RP11-30P6.6	ENSG00000234155	up	Lajoie et al. 2017
RP11-799O21.2	ENSG00000234248	up	Lajoie et al. 2017
AC113618.1	ENSG00000234279	up	Lajoie et al. 2017
AC116366.6	ENSG00000234290	down	Lajoie et al. 2017
RP11-308N19.1	ENSG00000234323	down	Lajoie et al. 2017
RNF219-AS1	ENSG00000234377	down	Lajoie et al. 2017
AC019118.2	ENSG00000234423	up	Lajoie et al. 2017
AC007880.1	ENSG00000234572	down	Lajoie et al. 2017
GAS5	ENSG00000234741	down	Lajoie et al. 2017
RP11-395P17.3	ENSG00000234771	down	Lajoie et al. 2017
LINC00163	ENSG00000234880	down	Lajoie et al. 2017
AC007879.2	ENSG00000234902	down	Lajoie et al. 2017
AC010983.1	ENSG00000235056	up	Lajoie et al. 2017
RP11-229P13.20	ENSG00000235117	up	Lajoie et al. 2017
AC009495.2	ENSG00000235192	down	Lajoie et al. 2017
AC093415.2	ENSG00000235257	up	Lajoie et al. 2017
LINC00957	ENSG00000235314	down	Lajoie et al. 2017
LINC00961	ENSG00000235387	down	Lajoie et al. 2017
RP11-16L9.4	ENSG00000235492	up	Lajoie et al. 2017
AP000477.2	ENSG00000235564	up	Lajoie et al. 2017
AC092580.4	ENSG00000235576	up	Lajoie et al. 2017
RP11-421L21.2	ENSG00000235795	down	Lajoie et al. 2017
RHOA-IT1	ENSG00000235908	down	Lajoie et al. 2017
AC010127.3	ENSG00000236107	up	Lajoie et al. 2017
AC003104.1	ENSG00000236194	down	Lajoie et al. 2017
AC092594.1	ENSG00000236204	down	Lajoie et al. 2017
lnc-IRS2-1	ENSG00000236242	up	Lajoie et al. 2017
ENO1-IT1	ENSG00000236269	down	Lajoie et al. 2017
RP11-59D5__B.2	ENSG00000236345	up	Lajoie et al. 2017
AC005220.3	ENSG00000236352	up	Lajoie et al. 2017
LINC01134	ENSG00000236423	down	Lajoie et al. 2017
AC123023.1	ENSG00000236452	up	Lajoie et al. 2017
LINC00896	ENSG00000236499	up	Lajoie et al. 2017
RC3H1-IT1	ENSG00000236535	down	Lajoie et al. 2017
RP11-732M18.3	ENSG00000236537	down	Lajoie et al. 2017
RP11-510H23.1	ENSG00000236548	up	Lajoie et al. 2017
RP11-243J16.7	ENSG00000236559	down	Lajoie et al. 2017
AC019118.3	ENSG00000236760	up	Lajoie et al. 2017
CBR3-AS1	ENSG00000236830	up	Lajoie et al. 2017
AP003774.1	ENSG00000236935	down	Lajoie et al. 2017
ANKRD44-IT1	ENSG00000236977	down	Lajoie et al. 2017
PRMT5-AS1	ENSG00000237054	down	Lajoie et al. 2017
DLEU7-AS1	ENSG00000237152	up	Lajoie et al. 2017
RP11-109A6.2	ENSG00000237224	up	Lajoie et al. 2017
AC007099.2	ENSG00000237293	up	Lajoie et al. 2017
AP001092.4	ENSG00000237410	up	Lajoie et al. 2017
RP1-159A19.4	ENSG00000237429	up	Lajoie et al. 2017
CECR7	ENSG00000237438	down	Lajoie et al. 2017
AP000476.1	ENSG00000237484	up	Lajoie et al. 2017
RP11-356I2.4	ENSG00000237499	up	Lajoie et al. 2017
AP001056.1	ENSG00000237604	down	Lajoie et al. 2017
lnc-CEP68-1	ENSG00000237638	down	Lajoie et al. 2017
AC007386.2	ENSG00000237638	down	Lajoie et al. 2017
ERICH1-AS1	ENSG00000237647	up	Lajoie et al. 2017
AC011995.1	ENSG00000237720	up	Lajoie et al. 2017
RP11-624M8.1	ENSG00000237742	down	Lajoie et al. 2017
AC092620.3	ENSG00000237772	down	Lajoie et al. 2017
AC002454.1	ENSG00000237819	up	Lajoie et al. 2017
RP4-668G5.1	ENSG00000237928	up	Lajoie et al. 2017
AC093642.3	ENSG00000237940	up	Lajoie et al. 2017
PRKCQ-AS1	ENSG00000237943	up	Lajoie et al. 2017
LINC00649	ENSG00000237945	up	Lajoie et al. 2017
RP11-443B7.1	ENSG00000238005	up	Lajoie et al. 2017
RP11-262H14.1	ENSG00000238113	up	Lajoie et al. 2017
LINC00426	ENSG00000238121	up	Lajoie et al. 2017
AC116366.5	ENSG00000238160	up	Lajoie et al. 2017
RP3-395M20.8	ENSG00000238164	down	Lajoie et al. 2017
SCARNA10	ENSG00000239002	down	Lajoie et al. 2017
RP11-379K17.4	ENSG00000239219	down	Lajoie et al. 2017
RP4-728D4.2	ENSG00000239636	up	Lajoie et al. 2017
PSMD6-AS2	ENSG00000239653	down	Lajoie et al. 2017
RP11-309L24.4	ENSG00000239815	down	Lajoie et al. 2017
RP11-38J22.6	ENSG00000240754	down	Lajoie et al. 2017
C21orf91-OT1	ENSG00000240770	up	Lajoie et al. 2017
AC093627.10	ENSG00000240859	up	Lajoie et al. 2017
RP13-635I23.3	ENSG00000240888	down	Lajoie et al. 2017
lnc-KIF20B-4	ENSG00000240996	up	Lajoie et al. 2017
LINC00877	ENSG00000241163	down	Lajoie et al. 2017
RP11-379B18.5	ENSG00000241288	up	Lajoie et al. 2017
PTPRG-AS1	ENSG00000241472	up	Lajoie et al. 2017
RP11-553L6.2	ENSG00000241490	down	Lajoie et al. 2017
RP3-455J7.4	ENSG00000241666	up	Lajoie et al. 2017
RP11-80H8.4	ENSG00000241679	down	Lajoie et al. 2017
RP11-38P22.2	ENSG00000241732	down	Lajoie et al. 2017
AC092620.2	ENSG00000241772	down	Lajoie et al. 2017
CTC-340A15.2	ENSG00000241956	up	Lajoie et al. 2017
RP11-147N17.1	ENSG00000242428	up	Lajoie et al. 2017
AC007620.3	ENSG00000242539	down	Lajoie et al. 2017
RP11-285F7.2	ENSG00000242861	down	Lajoie et al. 2017
LINC00883	ENSG00000243701	down	Lajoie et al. 2017
WDR86-AS1	ENSG00000243836	down	Lajoie et al. 2017
RP11-552M11.4	ENSG00000243960	down	Lajoie et al. 2017
AC007566.10	ENSG00000244055	down	Lajoie et al. 2017
RP11-495P10.7	ENSG00000244252	up	Lajoie et al. 2017
CTD-2314B22.3	ENSG00000244306	up	Lajoie et al. 2017
RP3-508I15.18	ENSG00000244491	down	Lajoie et al. 2017
SLC9A9-AS2	ENSG00000244493	up	Lajoie et al. 2017
AL122127.25	ENSG00000244620	down	Lajoie et al. 2017
RP5-894A10.2	ENSG00000244701	down	Lajoie et al. 2017
RP11-744N12.3	ENSG00000245008	down	Lajoie et al. 2017
MIR3150A	ENSG00000245080	down	Lajoie et al. 2017
RP3-330M21.5	ENSG00000245261	down	Lajoie et al. 2017
CTD-2540L5.6	ENSG00000245466	down	Lajoie et al. 2017
RP11-277P12.20	ENSG00000245648	up	Lajoie et al. 2017
CTB-26E19.1	ENSG00000245688	up	Lajoie et al. 2017
CRNDE	ENSG00000245694	up	Lajoie et al. 2017
RP11-796E2.4	ENSG00000245904	down	Lajoie et al. 2017
RP11-18H21.1	ENSG00000245954	up	Lajoie et al. 2017
RP11-696N14.1	ENSG00000246090	down	Lajoie et al. 2017
RP11-57A19.2	ENSG00000246465	up	Lajoie et al. 2017
RP11-1149O23.3	ENSG00000246582	down	Lajoie et al. 2017
RASSF8-AS1	ENSG00000246695	up	Lajoie et al. 2017
STARD4-AS1	ENSG00000246859	up	Lajoie et al. 2017
LINC00920	ENSG00000246898	up	Lajoie et al. 2017
SOCS2-AS1	ENSG00000246985	up	Lajoie et al. 2017
MIR210HG	ENSG00000247095	up	Lajoie et al. 2017
RP11-902B17.1	ENSG00000247287	up	Lajoie et al. 2017
RP11-1277A3.1	ENSG00000247679	down	Lajoie et al. 2017
LINC00926	ENSG00000247982	down	Lajoie et al. 2017
FAM13A-AS1	ENSG00000248019	down	Lajoie et al. 2017
RP11-468D11.1	ENSG00000248137	up	Lajoie et al. 2017
RP11-446J8.1	ENSG00000248138	up	Lajoie et al. 2017
RP11-148L24.1	ENSG00000248174	up	Lajoie et al. 2017
RP11-24I21.1	ENSG00000248210	up	Lajoie et al. 2017
TRIM52-AS1	ENSG00000248275	down	Lajoie et al. 2017
RP11-269F21.2	ENSG00000248432	up	Lajoie et al. 2017
CTB-118N6.3	ENSG00000248445	down	Lajoie et al. 2017
CTC-338M12.2	ENSG00000248473	down	Lajoie et al. 2017
BACH1-IT1	ENSG00000248476	down	Lajoie et al. 2017
CTB-47B11.3	ENSG00000248544	down	Lajoie et al. 2017
RP11-215P8.3	ENSG00000248559	down	Lajoie et al. 2017
RP11-768F21.1	ENSG00000248636	up	Lajoie et al. 2017
RP11-231L11.3	ENSG00000248773	down	Lajoie et al. 2017
RP11-798M19.3	ENSG00000248774	up	Lajoie et al. 2017
RP11-412P11.1	ENSG00000248837	up	Lajoie et al. 2017
UGDH-AS1	ENSG00000249348	up	Lajoie et al. 2017
LINC01060	ENSG00000249378	up	Lajoie et al. 2017
CTD-2231H16.1	ENSG00000249430	up	Lajoie et al. 2017
CTD-2587M2.1	ENSG00000249476	down	Lajoie et al. 2017
CTB-35F21.1	ENSG00000249526	down	Lajoie et al. 2017
AC226118.1	ENSG00000249574	down	Lajoie et al. 2017
RP11-440L14.1	ENSG00000249592	down	Lajoie et al. 2017
RP11-77P16.4	ENSG00000249846	up	Lajoie et al. 2017
PVT1	ENSG00000249859	up	Lajoie et al. 2017
CTB-57H20.1	ENSG00000249881	up	Lajoie et al. 2017
RP11-122C5.1	ENSG00000249911	up	Lajoie et al. 2017
RP11-584P21.2	ENSG00000250075	down	Lajoie et al. 2017
RP11-314N14.1	ENSG00000250102	up	Lajoie et al. 2017
RP11-371F15.3	ENSG00000250195	down	Lajoie et al. 2017
LINC00989	ENSG00000250334	down	Lajoie et al. 2017
LINC01021	ENSG00000250337	up	Lajoie et al. 2017
LINC00977	ENSG00000250400	up	Lajoie et al. 2017
RP11-714G18.1	ENSG00000250410	down	Lajoie et al. 2017
CTD-2297D10.2	ENSG00000250579	up	Lajoie et al. 2017
RP11-517I3.1	ENSG00000250602	up	Lajoie et al. 2017
RP1-240B8.3	ENSG00000250686	down	Lajoie et al. 2017
RP11-462G22.1	ENSG00000250739	up	Lajoie et al. 2017
RP11-501C14.5	ENSG00000250838	up	Lajoie et al. 2017
RP11-71E19.1	ENSG00000250934	up	Lajoie et al. 2017
AE000661.37	ENSG00000251002	up	Lajoie et al. 2017
CTD-2035E11.3	ENSG00000251131	down	Lajoie et al. 2017
RP11-281P23.1	ENSG00000251152	down	Lajoie et al. 2017
RP1-68D18.2	ENSG00000251194	down	Lajoie et al. 2017
RP11-81H14.2	ENSG00000251301	down	Lajoie et al. 2017
RP11-452H21.4	ENSG00000251323	down	Lajoie et al. 2017
CTD-2516F10.2	ENSG00000251364	down	Lajoie et al. 2017
LINC00958	ENSG00000251381	up	Lajoie et al. 2017
CTB-109A12.1	ENSG00000251405	down	Lajoie et al. 2017
RP11-586D19.2	ENSG00000251408	down	Lajoie et al. 2017
lnc-KLF15-3	ENSG00000251448	down	Lajoie et al. 2017
RP11-521B24.3	ENSG00000251602	up	Lajoie et al. 2017
RP11-774O3.3	ENSG00000251615	up	Lajoie et al. 2017
CTC-436K13.2	ENSG00000253134	up	Lajoie et al. 2017
CTB-164N12.1	ENSG00000253141	up	Lajoie et al. 2017
AC084082.3	ENSG00000253190	down	Lajoie et al. 2017
RP11-582J16.5	ENSG00000253200	down	Lajoie et al. 2017
RP11-809O17.1	ENSG00000253210	up	Lajoie et al. 2017
RP11-1149M10.2	ENSG00000253214	up	Lajoie et al. 2017
RP11-513O17.2	ENSG00000253301	up	Lajoie et al. 2017
KB-1460A1.1	ENSG00000253395	up	Lajoie et al. 2017
CTC-436K13.3	ENSG00000253424	up	Lajoie et al. 2017
PCAT1	ENSG00000253438	down	Lajoie et al. 2017
RP11-110G21.2	ENSG00000253475	down	Lajoie et al. 2017
MIR146A	ENSG00000253522	up	Lajoie et al. 2017
RP11-624C23.1	ENSG00000253535	down	Lajoie et al. 2017
OSGEPL1-AS1	ENSG00000253559	down	Lajoie et al. 2017
RP11-531A24.5	ENSG00000253636	down	Lajoie et al. 2017
CTC-436K13.1	ENSG00000253673	up	Lajoie et al. 2017
CTC-535M15.2	ENSG00000253693	up	Lajoie et al. 2017
lnc-C8orf74-3	ENSG00000253695	up	Lajoie et al. 2017
lnc-XKR4-2	ENSG00000253857	up	Lajoie et al. 2017
RP11-347C18.3	ENSG00000253878	up	Lajoie et al. 2017
RP11-203E8.1	ENSG00000253891	down	Lajoie et al. 2017
RP11-1023P17.2	ENSG00000253924	down	Lajoie et al. 2017
CTB-32H22.1	ENSG00000253968	up	Lajoie et al. 2017
RP1-16A9.1	ENSG00000253983	up	Lajoie et al. 2017
RP11-328K2.1	ENSG00000254048	up	Lajoie et al. 2017
RP11-32D16.1	ENSG00000254135	up	Lajoie et al. 2017
RP11-470M17.2	ENSG00000254143	up	Lajoie et al. 2017
RP11-419K12.1	ENSG00000254223	up	Lajoie et al. 2017
CTD-2281E23.2	ENSG00000254269	up	Lajoie et al. 2017
KB-1507C5.4	ENSG00000254281	down	Lajoie et al. 2017
lnc-CCDC69-1	ENSG00000254298	down	Lajoie et al. 2017
RP11-134O21.1	ENSG00000254319	up	Lajoie et al. 2017
RP11-318K15.2	ENSG00000254325	down	Lajoie et al. 2017
RP11-542A14.1	ENSG00000254350	up	Lajoie et al. 2017
HOXA-AS3	ENSG00000254369	down	Lajoie et al. 2017
RP11-21L19.1	ENSG00000254418	down	Lajoie et al. 2017
RP11-91P24.7	ENSG00000254459	down	Lajoie et al. 2017
AF131215.4	ENSG00000254556	down	Lajoie et al. 2017
RP11-152H18.3	ENSG00000254665	down	Lajoie et al. 2017
CTC-497E21.3	ENSG00000254670	up	Lajoie et al. 2017
RP11-727A23.4	ENSG00000254676	down	Lajoie et al. 2017
RP11-659G9.3	ENSG00000254698	down	Lajoie et al. 2017
CTD-2005H7.1	ENSG00000254731	up	Lajoie et al. 2017
AC022182.3	ENSG00000254802	up	Lajoie et al. 2017
TMEM9B-AS1	ENSG00000254860	down	Lajoie et al. 2017
CTC-378H22.1	ENSG00000254887	down	Lajoie et al. 2017
SCARNA9	ENSG00000254911	down	Lajoie et al. 2017
AF131215.3	ENSG00000254936	down	Lajoie et al. 2017
RP11-494M8.4	ENSG00000254951	up	Lajoie et al. 2017
lnc-ANO1-2	ENSG00000255143	up	Lajoie et al. 2017
RP11-60I3.5	ENSG00000255145	up	Lajoie et al. 2017
RP11-626H12.1	ENSG00000255191	up	Lajoie et al. 2017
RP11-945A11.1	ENSG00000255193	up	Lajoie et al. 2017
RP11-750H9.5	ENSG00000255197	down	Lajoie et al. 2017
RP11-142C4.6	ENSG00000255240	down	Lajoie et al. 2017
AF131215.2	ENSG00000255310	down	Lajoie et al. 2017
LINC01059	ENSG00000255414	up	Lajoie et al. 2017
CTD-2653D5.1	ENSG00000255438	down	Lajoie et al. 2017
RP11-91P24.6	ENSG00000255449	down	Lajoie et al. 2017
RP11-253I19.3	ENSG00000255670	down	Lajoie et al. 2017
SNHG1	ENSG00000255717	down	Lajoie et al. 2017
IFNG-AS1	ENSG00000255733	down	Lajoie et al. 2017
RP11-428G5.5	ENSG00000255760	down	Lajoie et al. 2017
RP11-20D14.3	ENSG00000255829	up	Lajoie et al. 2017
RP11-167N4.2	ENSG00000255847	down	Lajoie et al. 2017
RP11-495K9.5	ENSG00000255933	up	Lajoie et al. 2017
AP003419.16	ENSG00000255949	down	Lajoie et al. 2017
RP11-711M9.1	ENSG00000255989	down	Lajoie et al. 2017
LINC00944	ENSG00000256128	up	Lajoie et al. 2017
RP11-153K16.1	ENSG00000256321	up	Lajoie et al. 2017
RP11-856F16.2	ENSG00000256469	up	Lajoie et al. 2017
lnc-MLXIP-1	ENSG00000256546	up	Lajoie et al. 2017
AC156455.1	ENSG00000256546	up	Lajoie et al. 2017
RP11-75L1.1	ENSG00000256582	down	Lajoie et al. 2017
ZBTB11-AS1	ENSG00000256628	down	Lajoie et al. 2017
RP11-449P1.1	ENSG00000256923	up	Lajoie et al. 2017
RP11-114G22.1	ENSG00000256995	up	Lajoie et al. 2017
RP11-705C15.3	ENSG00000257027	down	Lajoie et al. 2017
RP11-266O8.1	ENSG00000257060	up	Lajoie et al. 2017
TMPO-AS1	ENSG00000257167	up	Lajoie et al. 2017
RP11-689B22.2	ENSG00000257221	down	Lajoie et al. 2017
RP11-164H13.1	ENSG00000257275	up	Lajoie et al. 2017
RP11-298I3.1	ENSG00000257285	down	Lajoie et al. 2017
RP11-983P16.4	ENSG00000257337	down	Lajoie et al. 2017
RP11-511B23.1	ENSG00000257345	up	Lajoie et al. 2017
RP11-641A6.2	ENSG00000257495	down	Lajoie et al. 2017
RP11-793H13.3	ENSG00000257550	up	Lajoie et al. 2017
RP11-349A22.5	ENSG00000257621	down	Lajoie et al. 2017
RP11-497G19.2	ENSG00000257654	up	Lajoie et al. 2017
RP11-620J15.3	ENSG00000257698	up	Lajoie et al. 2017
lnc-ELK3-1	ENSG00000257878	up	Lajoie et al. 2017
lnc-RNFT2-1	ENSG00000257883	up	Lajoie et al. 2017
RP11-443B7.3	ENSG00000258082	down	Lajoie et al. 2017
RP11-654D12.2	ENSG00000258216	down	Lajoie et al. 2017
RP11-658F2.8	ENSG00000258297	down	Lajoie et al. 2017
lnc-POTEM-3	ENSG00000258314	up	Lajoie et al. 2017
RP11-662J14.1	ENSG00000258418	up	Lajoie et al. 2017
RP11-588P7.1	ENSG00000258419	up	Lajoie et al. 2017
LINC00641	ENSG00000258441	down	Lajoie et al. 2017
RP11-164J13.1	ENSG00000258461	down	Lajoie et al. 2017
RP11-76E17.3	ENSG00000258476	up	Lajoie et al. 2017
RN7SL1	ENSG00000258486	up	Lajoie et al. 2017
CTD-2325P2.3	ENSG00000258623	down	Lajoie et al. 2017
RP11-739G5.1	ENSG00000258631	up	Lajoie et al. 2017
LINC00930	ENSG00000258647	up	Lajoie et al. 2017
RP11-547D23.1	ENSG00000258731	down	Lajoie et al. 2017
RP11-73E17.2	ENSG00000258738	down	Lajoie et al. 2017
RP11-688G15.3	ENSG00000258749	down	Lajoie et al. 2017
RP11-219E7.1	ENSG00000258810	down	Lajoie et al. 2017
RP11-293M10.2	ENSG00000258820	down	Lajoie et al. 2017
RP11-76E17.4	ENSG00000258831	up	Lajoie et al. 2017
RP11-713N11.5	ENSG00000258879	up	Lajoie et al. 2017
RP11-58E21.3	ENSG00000258929	down	Lajoie et al. 2017
RP11-407N17.5	ENSG00000258940	down	Lajoie et al. 2017
RP4-647C14.3	ENSG00000258944	down	Lajoie et al. 2017
RP11-597A11.6	ENSG00000259069	up	Lajoie et al. 2017
RP11-406H23.2	ENSG00000259113	up	Lajoie et al. 2017
RP11-293M10.6	ENSG00000259319	up	Lajoie et al. 2017
RP11-102L12.2	ENSG00000259326	down	Lajoie et al. 2017
lnc-BCL2L10-1	ENSG00000259327	down	Lajoie et al. 2017
RP11-761I4.3	ENSG00000259343	down	Lajoie et al. 2017
CTD-2308G16.1	ENSG00000259377	up	Lajoie et al. 2017
CTC-378H22.2	ENSG00000259436	down	Lajoie et al. 2017
RP11-430B1.2	ENSG00000259577	down	Lajoie et al. 2017
AC100830.3	ENSG00000259635	down	Lajoie et al. 2017
RP11-151N17.1	ENSG00000259659	down	Lajoie et al. 2017
IQCH-AS1	ENSG00000259673	up	Lajoie et al. 2017
RP11-16E12.2	ENSG00000259772	down	Lajoie et al. 2017
RP11-231E4.2	ENSG00000259779	up	Lajoie et al. 2017
AC002519.8	ENSG00000259810	up	Lajoie et al. 2017
RP11-284N8.3	ENSG00000259834	down	Lajoie et al. 2017
lnc-CHRAC1-2	ENSG00000259891	down	Lajoie et al. 2017
CTD-2651B20.7	ENSG00000259932	down	Lajoie et al. 2017
RP11-519C12.1	ENSG00000259935	down	Lajoie et al. 2017
CTD-3203P2.1	ENSG00000259940	down	Lajoie et al. 2017
RP11-121C2.2	ENSG00000259959	up	Lajoie et al. 2017
RP11-549B18.1	ENSG00000259985	up	Lajoie et al. 2017
AC027601.1	ENSG00000260005	down	Lajoie et al. 2017
RP11-469M7.1	ENSG00000260006	down	Lajoie et al. 2017
CTD-2651B20.6	ENSG00000260035	down	Lajoie et al. 2017
RP11-407G23.1	ENSG00000260148	up	Lajoie et al. 2017
RP11-481J2.2	ENSG00000260186	up	Lajoie et al. 2017
CTA-331P3.1	ENSG00000260188	up	Lajoie et al. 2017
lnc-IRX3-3	ENSG00000260194	up	Lajoie et al. 2017
RP1-239B22.5	ENSG00000260196	down	Lajoie et al. 2017
RP11-588K22.2	ENSG00000260244	up	Lajoie et al. 2017
RP5-1085F17.3	ENSG00000260257	down	Lajoie et al. 2017
RP11-480A16.1	ENSG00000260261	down	Lajoie et al. 2017
RP11-4F5.2	ENSG00000260359	down	Lajoie et al. 2017
RP11-521I2.3	ENSG00000260368	down	Lajoie et al. 2017
RP11-594N15.3	ENSG00000260398	down	Lajoie et al. 2017
RP11-119F7.5	ENSG00000260400	down	Lajoie et al. 2017
CTD-2542L18.1	ENSG00000260417	down	Lajoie et al. 2017
RP5-912I13.1	ENSG00000260426	up	Lajoie et al. 2017
RP4-561L24.3	ENSG00000260464	down	Lajoie et al. 2017
RP11-923I11.4	ENSG00000260473	up	Lajoie et al. 2017
RP11-219B4.7	ENSG00000260493	down	Lajoie et al. 2017
LINC00515	ENSG00000260583	up	Lajoie et al. 2017
RP11-552C15.1	ENSG00000260601	down	Lajoie et al. 2017
CTA-250D10.23	ENSG00000260655	down	Lajoie et al. 2017
7SK	ENSG00000260682	down	Lajoie et al. 2017
RP11-165M1.2	ENSG00000260723	down	Lajoie et al. 2017
RP11-106M3.2	ENSG00000260729	up	Lajoie et al. 2017
RP11-72I8.1	ENSG00000260735	down	Lajoie et al. 2017
RP11-797A18.4	ENSG00000260787	down	Lajoie et al. 2017
RP11-566E18.3	ENSG00000260804	up	Lajoie et al. 2017
lnc-VTI1A-2	ENSG00000260917	down	Lajoie et al. 2017
RP11-327F22.1	ENSG00000260929	down	Lajoie et al. 2017
RP11-77H9.8	ENSG00000260979	down	Lajoie et al. 2017
AC004158.2	ENSG00000261008	down	Lajoie et al. 2017
CTC-471C19.1	ENSG00000261037	up	Lajoie et al. 2017
CTD-2319I12.1	ENSG00000261040	down	Lajoie et al. 2017
RP11-61A14.3	ENSG00000261088	up	Lajoie et al. 2017
RP11-355O1.11	ENSG00000261094	down	Lajoie et al. 2017
RP11-325K4.2	ENSG00000261114	down	Lajoie et al. 2017
RP11-68I18.10	ENSG00000261168	up	Lajoie et al. 2017
RP11-201A3.1	ENSG00000261182	up	Lajoie et al. 2017
RP11-960L18.1	ENSG00000261218	down	Lajoie et al. 2017
RP11-830F9.7	ENSG00000261226	up	Lajoie et al. 2017
RP4-714D9.5	ENSG00000261254	up	Lajoie et al. 2017
RP11-389C8.2	ENSG00000261269	up	Lajoie et al. 2017
CTD-3105H18.13	ENSG00000261280	up	Lajoie et al. 2017
RP5-1057J7.6	ENSG00000261326	up	Lajoie et al. 2017
RP11-378A13.1	ENSG00000261338	down	Lajoie et al. 2017
RP11-698N11.4	ENSG00000261355	down	Lajoie et al. 2017
CTD-2083E4.7	ENSG00000261434	up	Lajoie et al. 2017
RP11-217B1.2	ENSG00000261441	down	Lajoie et al. 2017
RP11-1024P17.1	ENSG00000261468	down	Lajoie et al. 2017
PAN3-AS1	ENSG00000261485	up	Lajoie et al. 2017
RP11-757F18.5	ENSG00000261488	up	Lajoie et al. 2017
RP11-448G15.3	ENSG00000261490	down	Lajoie et al. 2017
CTB-31O20.2	ENSG00000261526	down	Lajoie et al. 2017
RP11-244O19.1	ENSG00000261534	down	Lajoie et al. 2017
RP11-16E23.3	ENSG00000261544	down	Lajoie et al. 2017
RP11-29G8.3	ENSG00000261553	down	Lajoie et al. 2017
RP11-524C21.2	ENSG00000261568	up	Lajoie et al. 2017
RP1-168P16.2	ENSG00000261574	down	Lajoie et al. 2017
CTB-31N19.3	ENSG00000261596	down	Lajoie et al. 2017
RP11-79H23.3	ENSG00000261618	down	Lajoie et al. 2017
RP11-529E10.6	ENSG00000261643	down	Lajoie et al. 2017
RP11-327F22.2	ENSG00000261644	down	Lajoie et al. 2017
RP5-1042I8.7	ENSG00000261662	down	Lajoie et al. 2017
RP1-168P16.1	ENSG00000261692	down	Lajoie et al. 2017
RP11-264M12.2	ENSG00000261707	up	Lajoie et al. 2017
LINC00922	ENSG00000261742	up	Lajoie et al. 2017
lnc-VSTM2B-8	ENSG00000261770	down	Lajoie et al. 2017
RP11-340F14.5	ENSG00000261827	down	Lajoie et al. 2017
RP11-473M20.7	ENSG00000261971	up	Lajoie et al. 2017
CTC-281F24.1	ENSG00000261996	down	Lajoie et al. 2017
RP11-2C24.6	ENSG00000262026	down	Lajoie et al. 2017
RP11-876N24.2	ENSG00000262151	down	Lajoie et al. 2017
RP5-867C24.4	ENSG00000262265	down	Lajoie et al. 2017
CTD-2561B21.4	ENSG00000262313	up	Lajoie et al. 2017
RP11-473M20.9	ENSG00000262370	up	Lajoie et al. 2017
LA16c-321D4.2	ENSG00000262482	up	Lajoie et al. 2017
RP11-334C17.5	ENSG00000262580	down	Lajoie et al. 2017
RP11-196G11.4	ENSG00000262766	down	Lajoie et al. 2017
RP11-304F15.7	ENSG00000262837	down	Lajoie et al. 2017
RP11-235E17.6	ENSG00000262903	down	Lajoie et al. 2017
RP11-473I1.9	ENSG00000262944	down	Lajoie et al. 2017
CTD-2047H16.4	ENSG00000263069	down	Lajoie et al. 2017
RP11-420A6.2	ENSG00000263220	down	Lajoie et al. 2017
RP11-473I1.10	ENSG00000263244	down	Lajoie et al. 2017
AP005530.2	ENSG00000263305	up	Lajoie et al. 2017
CTC-508F8.1	ENSG00000263331	up	Lajoie et al. 2017
AF001548.5	ENSG00000263335	down	Lajoie et al. 2017
CTC-264K15.6	ENSG00000263489	up	Lajoie et al. 2017
RP11-326K13.4	ENSG00000263823	down	Lajoie et al. 2017
RP11-110H1.9	ENSG00000263895	down	Lajoie et al. 2017
RP11-676J15.1	ENSG00000263958	up	Lajoie et al. 2017
CTD-2350C19.1	ENSG00000264098	down	Lajoie et al. 2017
RP11-159D12.2	ENSG00000264112	down	Lajoie et al. 2017
RP11-94L15.2	ENSG00000264198	down	Lajoie et al. 2017
RP11-173M1.8	ENSG00000264469	down	Lajoie et al. 2017
WI2-1959D15.1	ENSG00000264527	down	Lajoie et al. 2017
RP11-464D20.6	ENSG00000264546	down	Lajoie et al. 2017
RP11-769O8.3	ENSG00000264635	up	Lajoie et al. 2017
RP11-381P6.1	ENSG00000264660	down	Lajoie et al. 2017
RP11-260A9.6	ENSG00000264734	up	Lajoie et al. 2017
BZRAP1-AS1	ENSG00000265148	up	Lajoie et al. 2017
U3	ENSG00000265369	up	Lajoie et al. 2017
RP11-713C5.1	ENSG00000265579	up	Lajoie et al. 2017
RP11-68I3.11	ENSG00000265625	down	Lajoie et al. 2017
CTD-2267D19.2	ENSG00000265666	down	Lajoie et al. 2017
RP11-674N23.1	ENSG00000265962	down	Lajoie et al. 2017
RP11-466P24.7	ENSG00000266045	up	Lajoie et al. 2017
RP11-143J12.2	ENSG00000266053	down	Lajoie et al. 2017
RP5-1028K7.2	ENSG00000266088	down	Lajoie et al. 2017
RP11-209D14.4	ENSG00000266126	down	Lajoie et al. 2017
RP11-101O21.1	ENSG00000266357	up	Lajoie et al. 2017
RP11-227G15.8	ENSG00000266385	down	Lajoie et al. 2017
RP11-258F1.1	ENSG00000266677	down	Lajoie et al. 2017
RP11-690G19.3	ENSG00000266753	down	Lajoie et al. 2017
CTC-548K16.2	ENSG00000266913	up	Lajoie et al. 2017
RP11-799D4.4	ENSG00000266947	up	Lajoie et al. 2017
RP11-384O8.1	ENSG00000267034	up	Lajoie et al. 2017
RP11-35G9.3	ENSG00000267040	down	Lajoie et al. 2017
RP11-1094M14.5	ENSG00000267074	up	Lajoie et al. 2017
CTD-2020K17.1	ENSG00000267121	down	Lajoie et al. 2017
CTD-2357A8.3	ENSG00000267123	down	Lajoie et al. 2017
RP11-527L4.5	ENSG00000267166	up	Lajoie et al. 2017
CTC-510F12.4	ENSG00000267174	up	Lajoie et al. 2017
RP1-193H18.2	ENSG00000267194	down	Lajoie et al. 2017
RP11-861E21.2	ENSG00000267199	up	Lajoie et al. 2017
CTD-2319I12.4	ENSG00000267248	up	Lajoie et al. 2017
CTC-550B14.7	ENSG00000267265	down	Lajoie et al. 2017
CTD-2562J15.6	ENSG00000267275	down	Lajoie et al. 2017
MAP3K14-AS1	ENSG00000267278	down	Lajoie et al. 2017
KB-7G2.9	ENSG00000267338	up	Lajoie et al. 2017
RP1-178F10.3	ENSG00000267350	down	Lajoie et al. 2017
ZNF571-AS1	ENSG00000267470	down	Lajoie et al. 2017
lnc-MALT1-1	ENSG00000267504	down	Lajoie et al. 2017
RP11-13K12.1	ENSG00000267506	up	Lajoie et al. 2017
MIR24-2	ENSG00000267519	down	Lajoie et al. 2017
lnc-REL-1	ENSG00000267520	down	Lajoie et al. 2017
RP11-322E11.5	ENSG00000267583	up	Lajoie et al. 2017
RP11-400F19.18	ENSG00000267632	down	Lajoie et al. 2017
CTD-2286N8.2	ENSG00000267655	down	Lajoie et al. 2017
RP11-691H4.4	ENSG00000267694	up	Lajoie et al. 2017
RP11-456O19.4	ENSG00000267712	up	Lajoie et al. 2017
CTD-2189E23.1	ENSG00000267723	up	Lajoie et al. 2017
RP11-171I2.1	ENSG00000267784	up	Lajoie et al. 2017
CTD-2291D10.4	ENSG00000267886	up	Lajoie et al. 2017
CTC-244M17.1	ENSG00000268051	down	Lajoie et al. 2017
CTD-2545M3.8	ENSG00000268518	up	Lajoie et al. 2017
LINC00664	ENSG00000268658	up	Lajoie et al. 2017
CTD-2622I13.3	ENSG00000268670	down	Lajoie et al. 2017
AC010524.2	ENSG00000268686	up	Lajoie et al. 2017
CTD-2587H19.1	ENSG00000268802	up	Lajoie et al. 2017
CTD-3093M3.1	ENSG00000268816	up	Lajoie et al. 2017
CTC-429P9.3	ENSG00000269044	down	Lajoie et al. 2017
RP11-573N10.1	ENSG00000269189	up	Lajoie et al. 2017
CTD-2231E14.8	ENSG00000269243	down	Lajoie et al. 2017
CTB-83J4.2	ENSG00000269271	up	Lajoie et al. 2017
RP11-869B15.1	ENSG00000269290	down	Lajoie et al. 2017
CTB-92J24.2	ENSG00000269397	up	Lajoie et al. 2017
CTC-273B12.6	ENSG00000269423	down	Lajoie et al. 2017
CTB-180A7.6	ENSG00000269444	down	Lajoie et al. 2017
RP11-727F15.13	ENSG00000269463	down	Lajoie et al. 2017
CTB-102L5.7	ENSG00000269653	down	Lajoie et al. 2017
AC008982.2	ENSG00000269688	down	Lajoie et al. 2017
AC006115.3	ENSG00000269793	up	Lajoie et al. 2017
RMRP	ENSG00000269900	down	Lajoie et al. 2017
AF131215.9	ENSG00000269918	down	Lajoie et al. 2017
RP11-2B6.2	ENSG00000269929	down	Lajoie et al. 2017
RP11-727A23.11	ENSG00000269939	up	Lajoie et al. 2017
RP11-797A18.6	ENSG00000269951	down	Lajoie et al. 2017
RP11-73M18.9	ENSG00000269963	down	Lajoie et al. 2017
RP3-426I6.5	ENSG00000269971	down	Lajoie et al. 2017
RP11-932O9.10	ENSG00000269974	up	Lajoie et al. 2017
RP11-362K14.5	ENSG00000269984	down	Lajoie et al. 2017
RP11-395P17.11	ENSG00000269988	down	Lajoie et al. 2017
RP11-390K5.6	ENSG00000270060	down	Lajoie et al. 2017
SCARNA2	ENSG00000270066	down	Lajoie et al. 2017
RP1-257I20.14	ENSG00000270083	down	Lajoie et al. 2017
RP11-362K14.6	ENSG00000270096	down	Lajoie et al. 2017
CTD-2306M10.1	ENSG00000270107	down	Lajoie et al. 2017
RP11-415J8.7	ENSG00000270115	up	Lajoie et al. 2017
RP11-362K14.7	ENSG00000270135	down	Lajoie et al. 2017
RP5-1021I20.6	ENSG00000270140	down	Lajoie et al. 2017
CTD-2267D19.6	ENSG00000270145	up	Lajoie et al. 2017
RP5-894A10.6	ENSG00000270157	down	Lajoie et al. 2017
RP11-167P11.2	ENSG00000270165	down	Lajoie et al. 2017
RP5-1024G6.8	ENSG00000270172	up	Lajoie et al. 2017
RP11-355F16.1	ENSG00000270571	down	Lajoie et al. 2017
RP11-348N5.7	ENSG00000270589	down	Lajoie et al. 2017
RP11-105N14.1	ENSG00000270659	down	Lajoie et al. 2017
RP11-372K14.2	ENSG00000270681	down	Lajoie et al. 2017
SNORD64	ENSG00000270704	down	Lajoie et al. 2017
RP11-394I13.2	ENSG00000271151	down	Lajoie et al. 2017
TMCC1-AS1	ENSG00000271270	up	Lajoie et al. 2017
RP11-446E9.2	ENSG00000271722	down	Lajoie et al. 2017
RP11-52L5.6	ENSG00000271776	up	Lajoie et al. 2017
RP11-1017G21.5	ENSG00000271780	down	Lajoie et al. 2017
RP11-861A13.4	ENSG00000271856	down	Lajoie et al. 2017
RP11-343L5.2	ENSG00000271862	down	Lajoie et al. 2017
RP4-635E18.8	ENSG00000271895	down	Lajoie et al. 2017
RP11-444A22.1	ENSG00000271955	up	Lajoie et al. 2017
CTD-3064M3.7	ENSG00000271959	up	Lajoie et al. 2017
RP11-23P13.7	ENSG00000272003	down	Lajoie et al. 2017
RP1-313I6.12	ENSG00000272009	down	Lajoie et al. 2017
RP11-52A20.2	ENSG00000272033	down	Lajoie et al. 2017
KB-431C1.5	ENSG00000272037	up	Lajoie et al. 2017
AC005618.6	ENSG00000272070	up	Lajoie et al. 2017
RP11-542A14.2	ENSG00000272085	up	Lajoie et al. 2017
lnc-NIPBL-1	ENSG00000272103	down	Lajoie et al. 2017
lnc-ZNF131-3	ENSG00000272144	up	Lajoie et al. 2017
CTD-2035E11.5	ENSG00000272144	up	Lajoie et al. 2017
RP11-350N15.6	ENSG00000272159	up	Lajoie et al. 2017
CASC15	ENSG00000272168	up	Lajoie et al. 2017
RP11-802O23.3	ENSG00000272182	down	Lajoie et al. 2017
U47924.30	ENSG00000272201	down	Lajoie et al. 2017
CTD-3224K15.3	ENSG00000272255	down	Lajoie et al. 2017
RP11-489E7.4	ENSG00000272256	down	Lajoie et al. 2017
RP11-92K15.3	ENSG00000272264	down	Lajoie et al. 2017
RP11-53O19.3	ENSG00000272335	up	Lajoie et al. 2017
RP1-30M3.5	ENSG00000272345	down	Lajoie et al. 2017
RP11-363E6.4	ENSG00000272425	up	Lajoie et al. 2017
lnc-TXLNB-2	ENSG00000272446	up	Lajoie et al. 2017
RP3-395M20.12	ENSG00000272449	down	Lajoie et al. 2017
RP11-391M1.4	ENSG00000272452	down	Lajoie et al. 2017
RP1-86C11.7	ENSG00000272468	up	Lajoie et al. 2017
RP1-191J18.66	ENSG00000272476	up	Lajoie et al. 2017
RP11-158G18.1	ENSG00000272477	up	Lajoie et al. 2017
CTA-357J21.1	ENSG00000272544	down	Lajoie et al. 2017
RP11-152N13.16	ENSG00000272599	down	Lajoie et al. 2017
RP3-508I15.21	ENSG00000272669	down	Lajoie et al. 2017
RP11-127B20.3	ENSG00000272677	down	Lajoie et al. 2017
RP11-259N19.1	ENSG00000272711	up	Lajoie et al. 2017
KB-208E9.1	ENSG00000272733	up	Lajoie et al. 2017
ADIRF-AS1	ENSG00000272734	down	Lajoie et al. 2017
RP4-607J23.2	ENSG00000272782	down	Lajoie et al. 2017
RP5-855D21.3	ENSG00000272812	down	Lajoie et al. 2017
LL21NC02-1C16.2	ENSG00000272825	down	Lajoie et al. 2017
RP11-792A8.4	ENSG00000272831	up	Lajoie et al. 2017
RP11-798M19.6	ENSG00000272870	up	Lajoie et al. 2017
RP11-408A13.4	ENSG00000272871	down	Lajoie et al. 2017
AC013394.2	ENSG00000272888	down	Lajoie et al. 2017
RP11-440D17.3	ENSG00000272913	down	Lajoie et al. 2017
CTB-152G17.6	ENSG00000272918	down	Lajoie et al. 2017
RP11-508N22.12	ENSG00000272983	up	Lajoie et al. 2017
lnc-PSMG1-5	ENSG00000272991	up	Lajoie et al. 2017
RP11-225B17.2	ENSG00000273014	up	Lajoie et al. 2017
lnc-CREB3L4-1	ENSG00000273026	down	Lajoie et al. 2017
RP11-67L2.2	ENSG00000273033	down	Lajoie et al. 2017
CTB-13F3.1	ENSG00000273055	down	Lajoie et al. 2017
RP11-385F5.5	ENSG00000273058	down	Lajoie et al. 2017
RP11-428K3.1	ENSG00000273062	down	Lajoie et al. 2017
AC079610.1	ENSG00000273118	down	Lajoie et al. 2017
AC006946.16	ENSG00000273203	down	Lajoie et al. 2017
RP11-83A24.2	ENSG00000273247	up	Lajoie et al. 2017
RP11-888D10.4	ENSG00000273284	down	Lajoie et al. 2017
PAXIP1-AS1	ENSG00000273344	down	Lajoie et al. 2017
RP11-803P9.1	ENSG00000273375	down	Lajoie et al. 2017
lnc-AUH-3	ENSG00000273381	down	Lajoie et al. 2017
RP5-1065J22.8	ENSG00000273382	up	Lajoie et al. 2017
RP3-412A9.16	ENSG00000273387	up	Lajoie et al. 2017
AC004067.5	ENSG00000273447	up	Lajoie et al. 2017
RP11-218F10.3	ENSG00000273449	up	Lajoie et al. 2017
RP11-102N12.3	ENSG00000273472	down	Lajoie et al. 2017
lnc-MKI67IP-5	ENSG00000275345	up	Lajoie et al. 2017
lnc-COL4A1-2	ENSG00000275830	up	Lajoie et al. 2017
lnc-ABT1-1	ENSG00000275846	up	Lajoie et al. 2017
lnc-RSL24D1-1	ENSG00000279145	down	Lajoie et al. 2017
lnc-PPARA-1	ENSG00000280384	up	Lajoie et al. 2017
lnc-KIF20B-5	ENSG00000280560	up	Lajoie et al. 2017
lnc-PTPRE-1	ENSG00000280953	up	Lajoie et al. 2017
lnc-CHMP2B-1	ENSG00000281392	up	Lajoie et al. 2017
lnc-DLGAP2-3	ENSG00000282375	up	Lajoie et al. 2017
lnc-IRF8-1	ENSG00000285163	up	Lajoie et al. 2017
lnc-OSTC-2	ENSG00000286136	down	Lajoie et al. 2017
lnc-CDK9-1	ENSG00000286196	up	Lajoie et al. 2017
/lnc-ACTR3C-1/lnc-ACTR3C-2	ENSG00000286912	down	Lajoie et al. 2017
lnc-HIST1H2AI-1	ENSG00000287674	up	Lajoie et al. 2017
lnc-SIAH2-1	ENSG00000287688	down	Lajoie et al. 2017
lnc-TMEM140-1	ENSG00000287733	down	Lajoie et al. 2017
lnc-WFS1-1	ENSG00000288588	up	Lajoie et al. 2017
lnc-EFHA2-2		up	Lajoie et al. 2017
AWPPH	ENSG00000172965	up	Li et al. 2020 (22)
RP11-137H2.4	ENSG00000226659	up	Ouimet et al. 2017 (39)
AC156455.1	ENSG00000256546	up	Ouimet et al. 2017
CTA-331P3.1	ENSG00000260188	up	Ouimet et al. 2017
RP11-68I18.10	ENSG00000261168	up	Ouimet et al. 2017
KB-208E9.1	ENSG00000272733	up	Ouimet et al. 2017
SNHG16	ENSG00000163597	up	Yang et al. 2019 (43)
T-ALL-R-LncR1		up	Zhang et al. 2014 (44)
aMissing Ensembl codes are due to lack of experimental sequence evidence required for code assignment.
